1 **Title: Oropouche virus detection in saliva and urine.**

2

3 **Author's names:** Valdinete Alves do Nascimento<sup>1,2</sup>, João Hugo Abdalla Santos<sup>3,4</sup>,

4 Dana Cristina da Silva Monteiro<sup>1</sup>, Karina Pinheiro Pessoa<sup>1,5</sup>, Antonio José Leão

5 Cardoso<sup>1,5</sup>, Victor Costa de Souza<sup>1,2</sup>, Ligia Fernandes Abdalla<sup>6</sup>, Felipe Gomes

6 Naveca<sup>1,2,5</sup>

7

8 **Institutional affiliations:**

9

10 <sup>1</sup> Instituto Leônidas e Maria Deane, Fiocruz, Manaus, Amazonas, Brazil.

11 <sup>2</sup> Programa de Pós-Graduação em Biologia Celular e Molecular, Instituto Oswaldo

12 Cruz, Fiocruz, Rio de Janeiro, Brazil.

13 <sup>3</sup> Universidade Federal do Amazonas, Manaus, Amazonas, Brazil.

14 <sup>4</sup> Hospital Adventista de Manaus, Manaus, Amazonas, Brazil.

15 <sup>5</sup> Programa de Pós-Graduação em Biologia da Interação Patógeno-Hospedeiro, Instituto

16 Leônidas e Maria Diane – Fiocruz Amazônia, Manaus, Amazonas, Brazil.

17 <sup>6</sup> Universidade do Estado do Amazonas, Manaus, Amazonas, Brazil.

18

19

20 +Address correspondence to Felipe Gomes Naveca, [felipe.naveca@fiocruz.br](mailto:felipe.naveca@fiocruz.br)

21 <https://orcid.org/0000-0002-2888-1060>

22

## 23 Abstract

24

25 Oropouche virus (OROV) is an arthropod-borne virus of the *Peribunyaviridae* family,  
 26 transmitted to humans primarily by *Culicoides paraensis*. It is one of the main  
 27 arboviruses that infect humans in Brazil, mainly in the Amazon region. We report the  
 28 OROV detection in the saliva and urine five days after the symptom's onset. Results  
 29 were further confirmed by nucleotide sequencing and phylogenetic analysis. To our  
 30 knowledge, this is the first report that OROV may be detected in the saliva and urine of  
 31 infected patients. In addition, our results may contribute to the current knowledge  
 32 regarding the natural history of Oropouche fever.

33

34 **Key words:** Arboviruses; Orthobunyavirus; Oropouche virus; Saliva; Urine; Real-Time  
 35 Polymerase Chain Reaction

36

37 **Sponsorships:** CNPq / CAPES / MS-DECIT / FAPEAM / Fiocruz

38

39

## 40 Text

41 The Oropouche virus (OROV) is an arthropod-borne virus, with a triple-  
 42 segmented negative-stranded RNA linear genome. Each segment is designated  
 43 according to its size as L (large), M (medium), and S (small). This arbovirus belongs of  
 44 the *Peribunyaviridae* family, genus *Orthobunyavirus*, species *Oropouche*  
 45 *orthobunyavirus* (<https://talk.ictvonline.org/taxonomy/>), and two invertebrate vectors  
 46 have been associated with the urban transmission cycle, *Culicoides paraensis*  
 47 (Ceratopogonidae), which is considered the primary vector, and *Culex quinquefasciatus*  
 48 (Culicidae) <sup>(1)</sup>. Recently, one study reinforced the potential role of *Culex sp.* mosquitoes  
 49 in the OROV transmission <sup>(2)</sup>.

50 The infection with Oropouche virus can result in an acute febrile and  
 51 exanthematous illness, with symptoms frequently related to other viral infections such  
 52 as dengue. Oropouche fever cases were reported in several Brazilian states including  
 53 Amazonas, Acre, Pará, and Mato Grosso, as well as in other South America countries <sup>(2-</sup>  
 54 <sup>9)</sup>.

55 The Oropouche fever is usually confirmed by detecting OROV genome in the  
 56 plasma or serum of acutely infected patients, or by specific IgM serology during  
 57 convalescence <sup>(1,10,11)</sup>. Nevertheless, recent studies showed arboviruses detection using  
 58 other body fluids, such as saliva and urine. This was demonstrated to different viral  
 59 species such as *Chikungunya virus* (CHIKV, family *Togaviridae*, *Alphavirus* genus)  
 60 <sup>(12,13)</sup>; *Dengue virus* (DENV) <sup>(14)</sup>, *West Nile virus* (WNV) <sup>(15)</sup>, and *Zika virus* (ZIKV) <sup>(16-</sup>  
 61 <sup>18)</sup>, all members of the *Flaviviridae* family, *Flavivirus* genus. On the other hand, the  
 62 detection of an *Orthobunyavirus* in the saliva or urine was not reported to date.  
 63 Therefore, this study aimed to investigate the presence of OROV in these biological  
 64 specimens, during the acute phase of the illness.

Between February and June 2016, a total of 352 acute-phase specimens, collected amid 0 to 5 days after symptom's onset, were sent to Instituto Leônidas e Maria Deane – Fiocruz (ILMD), a research unit of the Brazilian Ministry of Health that was responsible for the laboratory diagnosis of ZIKV during its emergence in the Amazonas State, Brazil. Initially, plasma samples were submitted to RNA extraction using QIAamp Viral RNA Mini Kit (Qiagen), according to the manufacturer's instructions. Posteriorly, we tested all samples for ZIKV <sup>(19)</sup>; CHIKV <sup>(20)</sup>, and DENV <sup>(21)</sup>, by reverse transcription real-time polymerase chain reaction (RT-qPCR). A multiplex RT-qPCR assay further tested negative samples for Mayaro virus (MAYV) and OROV <sup>(10)</sup>.

We evaluated the saliva and the urine of five OROV positive patients in plasma, using the same protocol. Subsequently, the OROV positive samples were submitted to conventional RT-PCR targeting L, M, and S segments using a protocol developed by our group. Initially, we performed the reverse transcription reaction using SuperScript IV reverse transcriptase and random primers (Thermo Fisher Scientific). The cDNA was amplified in a reaction using 1.5mM of Mg<sup>2+</sup>, 0.2 mM of dNTPs, 1U of Platinum Taq DNA Polymerase (Thermo Fisher Scientific) and 0.3 μM of specific primers for S and L segments, and 0.5 μM for M segment (Table).

The nucleotide sequencing reaction was carried out on an ABI3130 genetic analyzer at the ILMD genomics platform. The data were analyzed using the Geneious software v10.2.6 <sup>(22)</sup> for quality check, trimming, and contig assembly. The genome segments sequenced in this study were analyzed together with three different datasets, one for each segment, containing 75 Orthobunyavirus species recognized by the International Committee on Taxonomy of Viruses (ICTV - Virus Metadata Repository: version June 1, 2019; MSL34 - <https://talk.ictvonline.org/taxonomy/vmr/m/vmr-file->

90 [repository/8287/download](#)), with the full genome records available in GenBank at 01-  
 91 Jun-2019. All datasets were aligned with MUSCLE (codons) embedded in MEGA X  
 92 software <sup>(23)</sup>. Species confirmation was performed using phylogenetic reconstruction by  
 93 Bayesian Inference (BI) with MrBayes 3.2.6 with two runs and 20 million Markov  
 94 chain Monte Carlo (MCMC) generations <sup>(24)</sup> at CIPRES Science Gateway V. 3.3  
 95 (<https://www.phylo.org>) and maximum-likelihood (ML) with PhyML 3.0 <sup>(25)</sup> with Smart  
 96 Model Selection (SMS) <sup>(26)</sup> (<http://www.atgc-montpellier.fr/phyml/>). All procedures of  
 97 this study were according to the Ethics Committee of the State University of Amazonas  
 98 (CAAE: 56,745,116.6.0000.5016).

99       Among the tested plasma samples, 202 were positive for ZIKV, one for CHIKV,  
 100 three for DENV, and five to OROV. All OROV positive patients in plasma had saliva  
 101 and urine further evaluated. One fifty-one years-old female patient  
 102 (BR\_AM\_ILMD\_0240AOS\_2016), living in Manaus, Amazonas State, Brazil, whose  
 103 samples were collected at 2016-04-11, five days after the symptom's onset, presented  
 104 positivity for OROV both in saliva and urine, with Cts values of 31 and 26,  
 105 respectively. According to the medical records, the patient presents fever, rash, myalgia,  
 106 pruritus, headache, arthralgia, lymphadenopathy, diarrhea, and vomit during illness.

107       Partial CDS sequencing was successful for both the L (396bp), M (648bp), and S  
 108 (555bp) segments and these sequences were used for phylogenetic reconstruction, using  
 109 a dataset of ICTV recognized Orthobunyavirus species. Both BI and ML phylogeny  
 110 were evaluated using the nucleotide substitution model GTR+G+I, as selected by the  
 111 SMS approach. All Bayesian runs reached convergence with an average standard  
 112 deviation of split frequencies lower than 0.009 and ESS values > 200. For the three  
 113 genome segments, the sample BR\_AM\_ILMD\_0240AOS\_2016 clustered with the

114 OROV RefSeq with high (1.0) posterior probability support (Figure). The same  
115 topology was observed in the ML tree (data not shown).

116 Several reports have shown that different arboviruses like ZIKV and CHIKV can  
117 be detected testing unusual body fluids, such as saliva and urine. Two studies with  
118 samples collected from patients infected with ZIKV showed that some individuals were  
119 positive only in saliva and not in serum <sup>(17,27)</sup>. Interesting, our group found similar  
120 results during the ZIKV emergence in the Amazonas State, Brazil (unpublished  
121 observations). Other reports showed that saliva might be an alternative specimen for  
122 CHIKV detection during the acute phase of illness, with positivity ranging from 58.3 to  
123 77% <sup>(12,13)</sup>. However, no previous study reported the detection of a member of the  
124 *Orthobunyavirus* genus in these biological fluids.

125 Therefore, we decided to investigate if OROV, an endemic arbovirus in the  
126 Amazon region, could also be identified using the same biological specimens. In the  
127 present study, OROV was detected by RT-qPCR in saliva and urine of one patient,  
128 whose specimens were collected five days after the symptom's onset. This result was  
129 further confirmed by conventional RT-PCR, followed by nucleotide sequencing and  
130 phylogenetic analysis using the ICTV reference database for orthobunyaviruses, which  
131 clustered all the three genomic segments sequences obtained in this work with the  
132 OROV RefSeqs.

133 It was beyond the scope of the present study to assess the best human specimen  
134 for OROV detection, but it was interesting that we found the higher viral load in urine,  
135 when compared with saliva or plasma. Prior studies have also reported the detection of  
136 arboviruses in urine. One study with WNV, an arbovirus of the *Flaviviridae* family,  
137 reported a higher viral load in urine than in plasma, during the acute phase of illness <sup>(15)</sup>.  
138 On the other hand, two different studies with CHIKV and DENV showed a significantly

139 lower rate of detection when urine was tested during the first days after symptom's  
140 onset, in comparison with samples collected during the second week of illness <sup>(13,14)</sup>.  
141 Altogether, these results suggest that urine may be used as a specimen for different  
142 arbovirus detection. Albeit, longitudinal studies, with a more significant number of  
143 patients, are necessary to evaluate the potential use of different body fluids for OROV  
144 detection.

145 To our knowledge, this is the first report that OROV may be detected in the  
146 saliva and urine of infected patients, showing that these specimens can be employed as  
147 alternative sources for the detection of OROV and, perhaps, for other members in the  
148 *Peribunyaviridae* family. Moreover, the detection of OROV in urine and saliva strongly  
149 suggests that this virus sheds into additional body fluids than blood and Cerebrospinal  
150 fluid, as previously reported <sup>(28)</sup>. Therefore, our results may further contribute to the  
151 current knowledge regarding the natural history of Oropouche fever.

152

#### 153 **Nucleotide sequence accession number:**

154 The partial CDS sequences of OROV isolate BR\_AM\_ILMD\_0240AOS\_2016 are  
155 available in GenBank, under the accession numbers MN419356 (L); MN419357 (M);  
156 MN419358 (S).

157

#### 158 **ACKNOWLEDGEMENTS:**

159 FGN is funded by Fundação de Amparo à Pesquisa do Estado do Amazonas – FAPEAM  
160 call 001/2014 – PROEP / 062.01939/2014); Conselho Nacional de Desenvolvimento Científico  
161 e Tecnológico (<http://www.cnpq.br>, grant 440856/2016-7) and Coordenação de  
162 Aperfeiçoamento de Pessoal de Nível Superior (<http://www.capes.gov.br>, grants  
163 88881.130825/2016-01 and 88887.130823/2016-00) call MCTIC/FNDCT -CNPq / MEC-  
164 CAPES/ MS-Decit 14/2016 – Prevenção e Combate ao vírus Zika; Programa Inova Fiocruz,

165 Edital Geração de Conhecimento - VPPCB-007-FIO-18. FGN is a CNPq fellow. The authors  
166 thank the Program for Technological Development in Tools for Health-PDTIS FIOCRUZ for  
167 use of nucleotide sequencing facilities at ILMD — Fiocruz Amazônia. We also thank the  
168 Institut Français de Bioinformatique and France Génomique for the use of the ATGC  
169 bioinformatics platform (PhyML), as well as the CIPRES Science Gateway for the use of the  
170 Cyberinfrastructure (MrBayes). The funders had no role in study design, data collection and  
171 analysis, decision to publish, or preparation of the manuscript.

172

### 173 **AUTHOR'S CONTRIBUTION:**

174 VAN, LFA, JHAS, and FGN conceived the study. VAN, LFA, JHAS, and FGN designed the  
175 study protocol. VAN, DCSM, KPP, AJLC, VCS, and FGN performed the molecular tests and  
176 the analysis and interpretation of these data. LFA and JHAS collected clinical information.  
177 VAN and FGN wrote the manuscript. FGN financed the study. VAN, LFA, and FGN critically  
178 revised the manuscript for intellectual content. All authors read and approved the final  
179 manuscript.

180

### 181 **REFERENCES**

182

- 183 1. Travassos da Rosa JF, de Souza WM, Pinheiro F de P, Figueiredo ML, Cardoso JF,  
184 Acrani GO, et al. Oropouche Virus: Clinical, Epidemiological, and Molecular Aspects of  
185 a Neglected Orthobunyavirus. *Am J Trop Med Hyg* 2017;96(5):1019–30.
- 186 2. Cardoso BF, Serra OP, Heinen LBDS, Zuchi N, Souza VC de, Naveca FG, et al.  
187 Detection of Oropouche virus segment S in patients and in *Culex quinquefasciatus* in the  
188 state of Mato Grosso, Brazil. *Mem Inst Oswaldo Cruz* 2015;110(6):745–54.
- 189 3. Mourão MPG, Bastos MS, Gimaqu JBL, Mota BR, Souza GS, Grimmer GHN, et al.  
190 Oropouche fever outbreak, Manaus, Brazil, 2007-2008. *Emerging Infect Dis*  
191 2009;15(12):2063–4.
- 192 4. Azevedo RSDS, Nunes MRT, Chiang JO, Bensabath G, Vasconcelos HB, Pinto AYDN,  
193 et al. Reemergence of Oropouche fever, northern Brazil. *Emerging Infect Dis*  
194 2007;13(6):912–5.



- 195 5. Bernardes-Terzian AC, de-Moraes-Bronzoni RV, Drumond BP, Da Silva-Nunes M, da-  
196 Silva NS, Urbano-Ferreira M, et al. Sporadic oropouche virus infection, acre, Brazil.  
197 *Emerging Infect Dis* 2009;15(2):348–50.
- 198 6. Naveca FG, Nascimento VA, Souza VC, de Figueiredo RMP. Human Orthobunyavirus  
199 *Infections*, Tefé, Amazonas, Brazil. *PLoS Curr* 2018;10.
- 200 7. Romero-Alvarez D, Escobar LE. Oropouche fever, an emergent disease from the  
201 *Americas*. *Microbes Infect* 2018;20(3):135–46.
- 202 8. Wise EL, Pullan ST, Márquez S, Paz V, Mosquera JD, Zapata S, et al. Isolation of  
203 Oropouche Virus from Febrile Patient, Ecuador. *Emerging Infect Dis* 2018;24(5):935–7.
- 204 9. Alva-Urcia C, Aguilar-Luis MA, Palomares-Reyes C, Silva-Caso W, Suarez-Ognio L,  
205 Weilg P, et al. Emerging and reemerging arboviruses: A new threat in Eastern Peru.  
206 *PLoS ONE* 2017;12(11):e0187897.
- 207 10. Naveca FG, Nascimento VAD, Souza VC de, Nunes BTD, Rodrigues DSG, Vasconcelos  
208 PFDC. Multiplexed reverse transcription real-time polymerase chain reaction for  
209 simultaneous detection of Mayaro, Oropouche, and Oropouche-like viruses. *Mem Inst*  
210 *Oswaldo Cruz* 2017;112(7):510–3.
- 211 11. Nunes MRT, de Souza WM, Savji N, Figueiredo ML, Cardoso JF, da Silva SP, et al.  
212 Oropouche orthobunyavirus: Genetic characterization of full-length genomes and  
213 development of molecular methods to discriminate natural reassortments. *Infect Genet*  
214 *Evol* 2019;68:16–22.
- 215 12. Gardner J, Rudd PA, Prow NA, Belarbi E, Roques P, Larcher T, et al. Infectious  
216 Chikungunya Virus in the Saliva of Mice, Monkeys and Humans. *PLoS ONE*  
217 2015;10(10):e0139481.
- 218 13. Musso D, Teissier A, Rouault E, Teururai S, de Pina J-J, Nhan T-X. Detection of  
219 chikungunya virus in saliva and urine. *Virol J* 2016;13(1):102.
- 220 14. Hirayama T, Mizuno Y, Takeshita N, Kotaki A, Tajima S, Omatsu T, et al. Detection of  
221 dengue virus genome in urine by real-time reverse transcriptase PCR: a laboratory  
222 diagnostic method useful after disappearance of the genome in serum. *J Clin Microbiol*  
223 2012;50(6):2047–52.
- 224 15. Barzon L, Pacenti M, Franchin E, Pagni S, Martello T, Cattai M, et al. Excretion of West  
225 Nile virus in urine during acute infection. *J Infect Dis* 2013;208(7):1086–92.
- 226 16. Barzon L, Pacenti M, Berto A, Sinigaglia A, Franchin E, Lavezzo E, et al. Isolation of  
227 infectious Zika virus from saliva and prolonged viral RNA shedding in a traveller  
228 returning from the Dominican Republic to Italy, January 2016. *Euro Surveill*  
229 2016;21(10):30159.
- 230 17. Musso D, Roche C, Nhan T-X, Robin E, Teissier A, Cao-Lormeau V-M. Detection of  
231 Zika virus in saliva. *J Clin Virol* 2015;68:53–5.
- 232 18. Jeong YE, Cha G-W, Cho JE, Lee EJ, Jee Y, Lee W-J. Viral and serological kinetics in  
233 Zika virus-infected patients in South Korea. *Virol J* 2017;14(1):70–6.
- 234 19. Lanciotti RS, Kosoy OL, Laven JJ, Velez JO, Lambert AJ, Johnson AJ, et al. Genetic  
235 and Serologic Properties of Zika Virus Associated with an Epidemic, Yap State,  
236 Micronesia, 2007. *Emerging Infect Dis* 2008;14(8):1232–9.

237 20. Lanciotti RS, Kosoy OL, Laven JJ, Panella AJ, Velez JO, Lambert AJ, et al.  
238 Chikungunya virus in US travelers returning from India, 2006. *Emerging Infect Dis*  
239 2007;13(5):764–7.

240 21. Gurukumar KR, Priyadarshini D, Patil JA, Bhagat A, Singh A, Shah PS, et al.  
241 Development of real time PCR for detection and quantitation of Dengue Viruses. *Virol J*  
242 2009;6(1):10.

243 22. Kearse M, Moir R, Wilson A, Stones-Havas S, Cheung M, Sturrock S, et al. Geneious  
244 Basic: an integrated and extendable desktop software platform for the organization and  
245 analysis of sequence data. *Bioinformatics* 2012;28(12):1647–9.

246 23. Kumar S, Stecher G, Li M, Knyaz C, Tamura K. MEGA X: Molecular Evolutionary  
247 Genetics Analysis across Computing Platforms. *Mol Biol Evol* 2018;35(6):1547–9.

248 24. Ronquist F, Teslenko M, van der Mark P, Ayres DL, Darling A, Höhna S, et al. MrBayes  
249 3.2: efficient Bayesian phylogenetic inference and model choice across a large model  
250 space. *Syst Biol* 2012;61(3):539–42.

251 25. Guindon S, Lethiec F, Duroux P, Gascuel O. PHYML Online--a web server for fast  
252 maximum likelihood-based phylogenetic inference. *Nucleic Acids Res* 2005;33(Web  
253 Server issue):W557–9.

254 26. Lefort V, Longueville J-E, Gascuel O. SMS: Smart Model Selection in PhyML. *Mol*  
255 *Biol Evol* 2017;34(9):2422–4.

256 27. Abdalla LF, Santos JHA, Barreto RTJ, Souza EME, D'Assunção FF, Borges MA, et al.  
257 Atrial fibrillation in a patient with Zika virus infection. *Virol J* 2018;15(1):23.

258 28. Bastos M de S, Figueiredo LTM, Naveca FG, Monte RL, Lessa N, Pinto de Figueiredo  
259 RM, et al. Identification of Oropouche Orthobunyavirus in the cerebrospinal fluid of  
260 three patients in the Amazonas, Brazil. *Am J Trop Med Hyg* 2012;86(4):732–5.

261

**Table. Oligonucleotides designed and used in this study.**

263

| Oligo           | Sequence (5'- 3')          | Start | Stop |
|-----------------|----------------------------|-------|------|
| OROV_L_56_FNF   | TTGCTCAACCARTATCGRAATAGGAT | 56    | 81   |
| OROV_L_174_FNF  | CTGCAAACTTGAGTAYAGAAATGATG | 174   | 200  |
| OROV_L_621_FNR  | TCAATCCATGGCAATGTCATTGT    | 621   | 599  |
| OROV_M_2185_FNF | TCCCAAATCTAATCCTTTTACYGAT  | 2185  | 2209 |
| OROV_M_2864_FNF | AGTATAGATGTACAAGGTACAGAATC | 2864  | 2889 |
| OROV_M_3564_FNR | TTCCTTCTCATAGCATGGCAT      | 3564  | 3544 |
| OROV_S_6_FNF    | TGTACTCCACAATTCAAAACAT     | 6     | 27   |
| OROV_S_133_FNF  | ACGGACAAGTGCTCAATGCT       | 133   | 152  |
| OROV_S_728_FNR  | TCCGAATTGGCGCAAGAAGT       | 728   | 709  |

  

| Assay                          | Primer pairs                      | Size (bp) |
|--------------------------------|-----------------------------------|-----------|
| L - 1 <sup>st</sup> PCR (55°C) | OROV_L_56_FNF + OROV_L_621_FNR    | 566       |
| L – semi-nested (50°C)         | OROV_L_174_FNF + OROV_L_621_FNR   | 448       |
| M - 1 <sup>st</sup> PCR (55°C) | OROV_M_2185_FNF + OROV_M_3564_FNR | 1380      |
| M - semi-nested (55°C)         | OROV_M_2864_FNF + OROV_M_3564_FNR | 701       |
| S - 1 <sup>st</sup> PCR (58°C) | OROV_S_6_FNF + OROV_S_728_FNR     | 723       |
| S - semi-nested (58°C)         | OROV_S_133_FNF + OROV_S_728_FNR   | 596       |

264

265 Start/Stop positions refers to the nucleotide position of OROV GenBank reference sequence  
266 NC\_005776.1 (segment L); NC\_005775.1 (segment M); NC\_005777.1 (segment S). To  
267 increase sensitivity, we developed semi-nested reactions for each genome segment. All 1<sup>st</sup> PCR  
268 reactions followed the same program: 94°C for 2 minutes for enzyme activation; 35 X (94°C for  
269 30 seconds, 55 or 58°C for 30 seconds, and 72°C during 1 minute / Kb), a final step at 72°C for  
270 5 minutes. For semi-nested reactions: 94°C for 2 minutes for enzyme activation; 30 X (94°C for  
271 30 seconds, 50, 55 or 58°C for 30 seconds, and 72°C during 1 minute / Kb), a final step at 72°C  
272 for 5 minutes. All primers used in this study were synthesized by IDT DNA Technology, USA.

273

274

275 **Figure. Phylogenetic tree of Orthobunyavirus species.** Three mid-rooted Bayesian trees, one  
 276 for each genome segment, were constructed with MrBayes software v3.2.6 and 76 taxa (the 75  
 277 Orthobunyavirus species recognized by the International Committee on Taxonomy of Viruses  
 278 (ICTV) with complete genome records available in GenBank at 01-Jun-2019 and the sample  
 279 BR\_AM\_ILMD\_0240AOS\_2016 reported in this study). Phylogenetic trees were set mid-  
 280 rooted, with increased node order in FigTree 1.4.4 for clarity. A color-key represents the  
 281 posterior probability values of each branch. The clade containing the sequence described in this  
 282 study is highlighted in yellow, clustered with the Oropouche virus Refseq. The scale bar  
 283 represents nucleotide substitutions per site. A = L segment tree; B = M segment tree; C = S  
 284 segment tree.

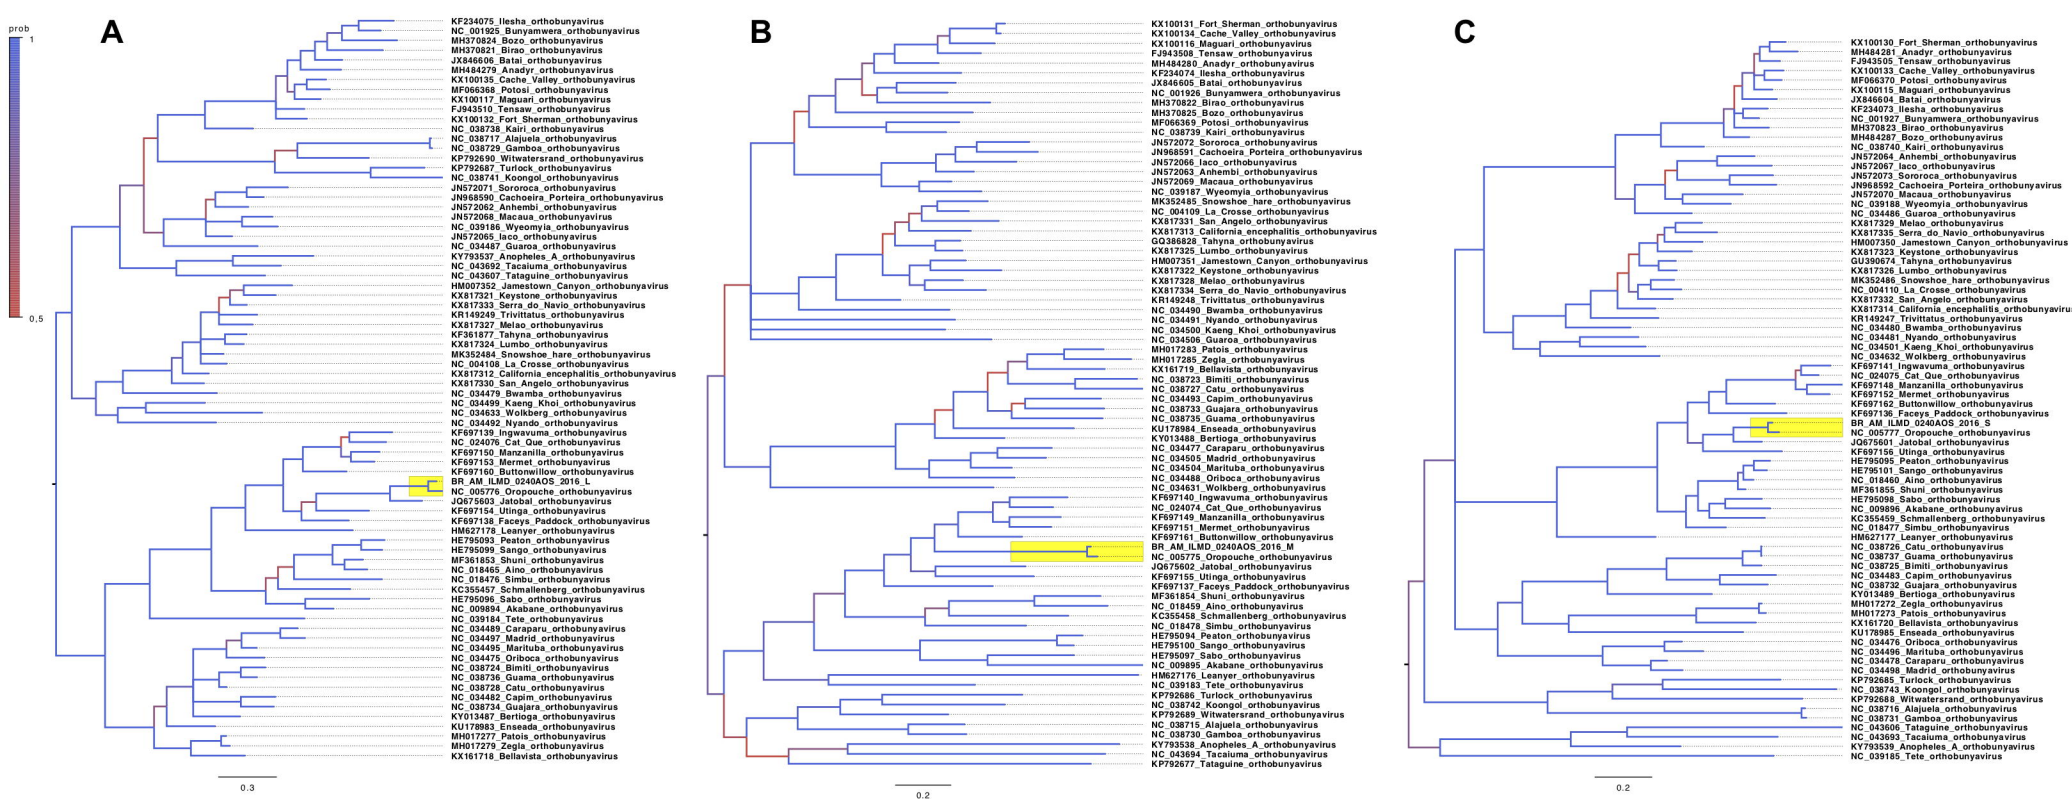

Source: https://www.biorxiv.org/content/10.1101/758839v1.full.pdf
